# Supplementary material for: Effects of vitamin D on thyroid autoimmunity markers in Hashimoto’s thyroiditis: systematic review and meta-analysis
Source: PubMed Central journal article supplement — J Int Med Res. 2021 Dec 6;49(12):03000605211060675. doi: 10.1177/03000605211060675 (PMC8711703; doi:10.1177/03000605211060675), 2021-12-06
Supplement: sj-pdf-1-imr-10.1177_03000605211060675.pdf [file sj-pdf-1-imr-10.1177_03000605211060675.pdf]

## Appendix: Full search strategy

### **China Network Knowledge Infrastructure (CNKI):**

#1 (theme = Hashimoto thyroiditis) OR (theme = chronic lymphocytic thyroiditis) OR (theme = autoimmune thyroiditis)

#2 (theme = Vitamin D) OR (theme = calciferol) OR (theme = 1,25(OH)<sub>2</sub>D<sub>3</sub>)

#3 #1 AND #2

### **Cochrane Central Register of Controlled Trials (CENTRAL)**

#1 (hashimoto thyroiditis): ti,ab,kw OR (hashimoto struma): ti,ab,kw OR (hashimotos syndrome): ti,ab,kw OR (chronic lymphocytic thyroiditis): ti,ab,kw OR (hashimotos disease): ti,ab,kw (Word variations have been searched)

#2 (vitamin D): ti,ab,kw OR (Ergocalciferols): ti,ab,kw OR (Cholecalciferol): ti,ab,kw OR (Hydroxycholecalciferols): ti,ab,kw OR (Ergocalciferols): ti,ab,kw (Word variations have been searched)

#3 #1 AND #2

### **Embase**

#1 'hashimoto disease': ti,ab,kw OR 'hashimoto struma': ti,ab,kw OR 'hashimotos syndrome': ti,ab,kw OR 'chronic lymphocytic thyroiditis': ti,ab,kw OR 'hashimotos disease': ti,ab,kw

#2 'vitamin d': ti,ab,kw OR cholecalciferol: ti,ab,kw OR hydroxycholecalciferols: ti,ab,kw OR ergocalciferols: ti,ab,kw OR '25-hydroxyvitamin d3': ti,ab,kw OR dihydrotachysterol: ti,ab,kw

#3 #1 AND #2
